# Supplementary material for: Sandblasting reduces dental implant failure rate but not marginal bone level loss: A systematic review and meta-analysis
Source: PubMed Central journal article supplement (PMC6499471; doi:10.1371/journal.pone.0216428), 2019-05-03

## Supplementary Appendix 4. Publication bias (funnel plots).

Funnel plot for pooled risk ratio analysis of implant failure rate after 1 year.

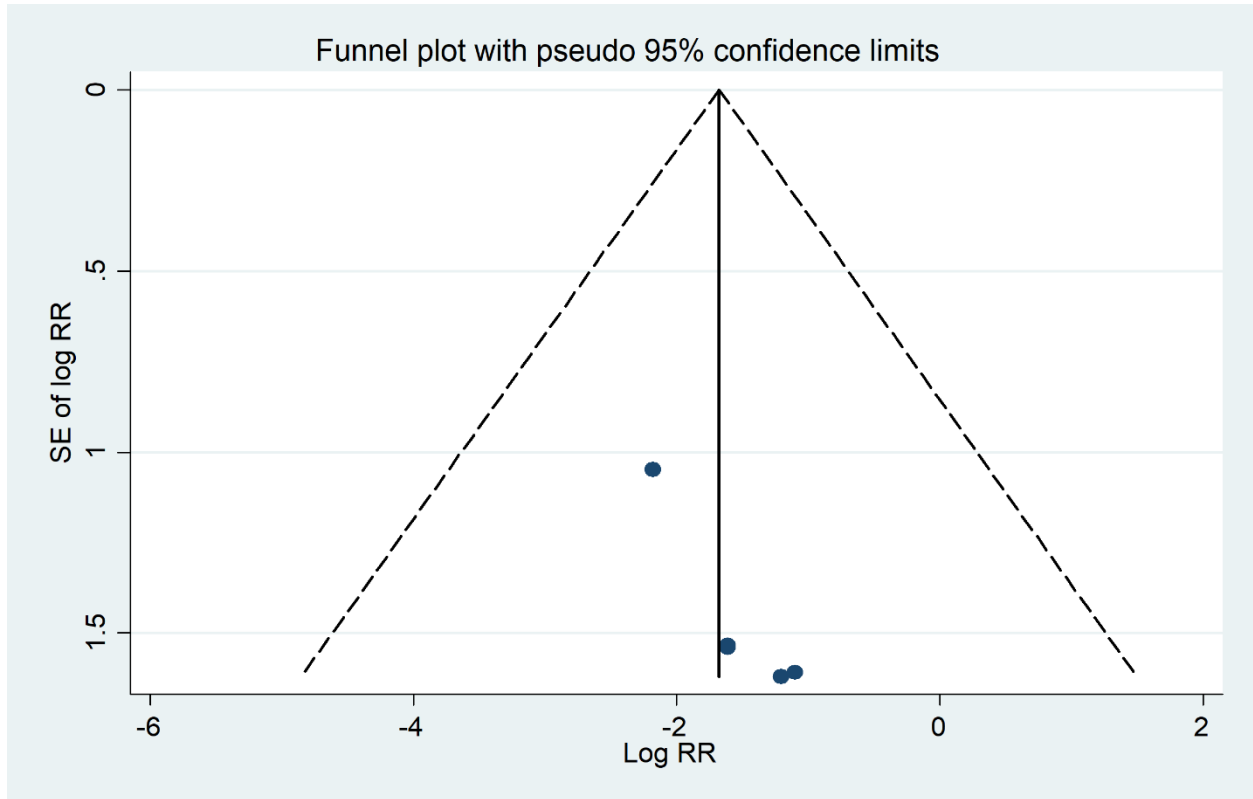

**Funnel plot for pooled risk ratio analysis of implant failure rate after 2 years.**

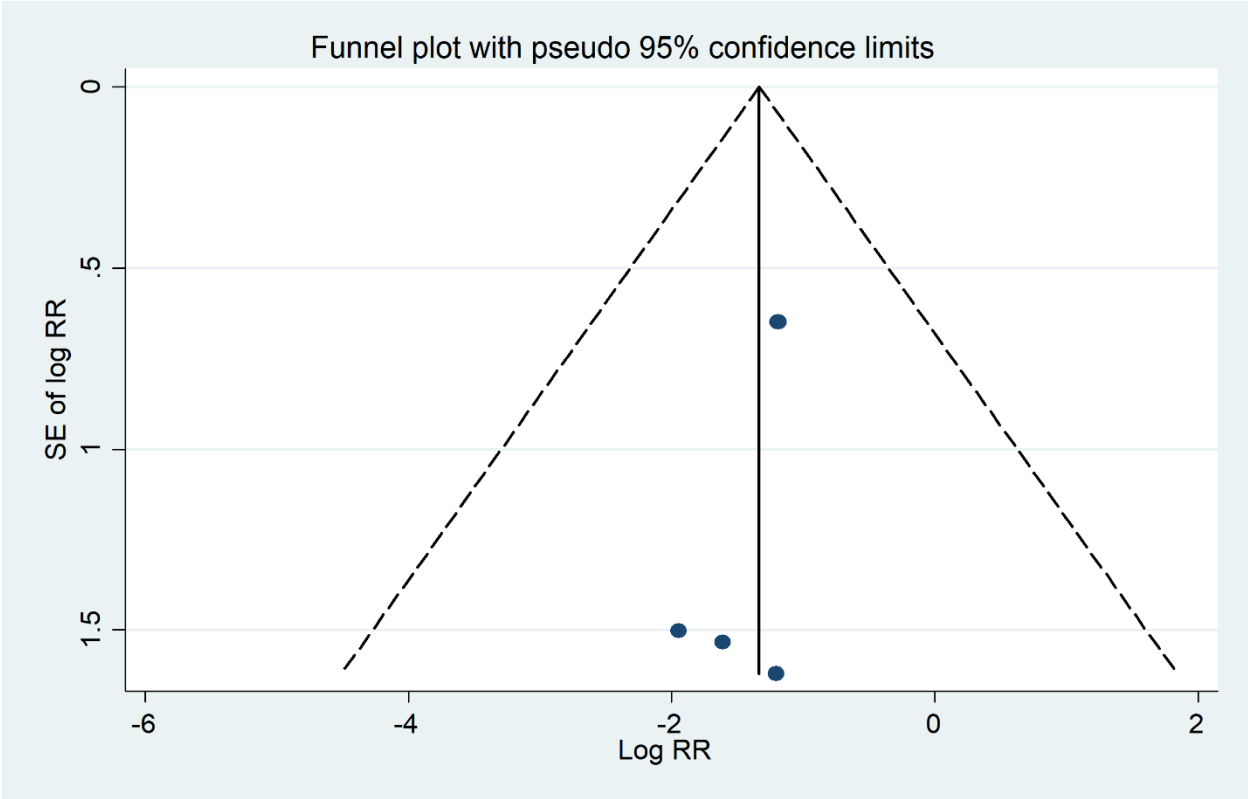

**Funnel plot for pooled risk ratio analysis of implant failure rate after 5-6 years.**

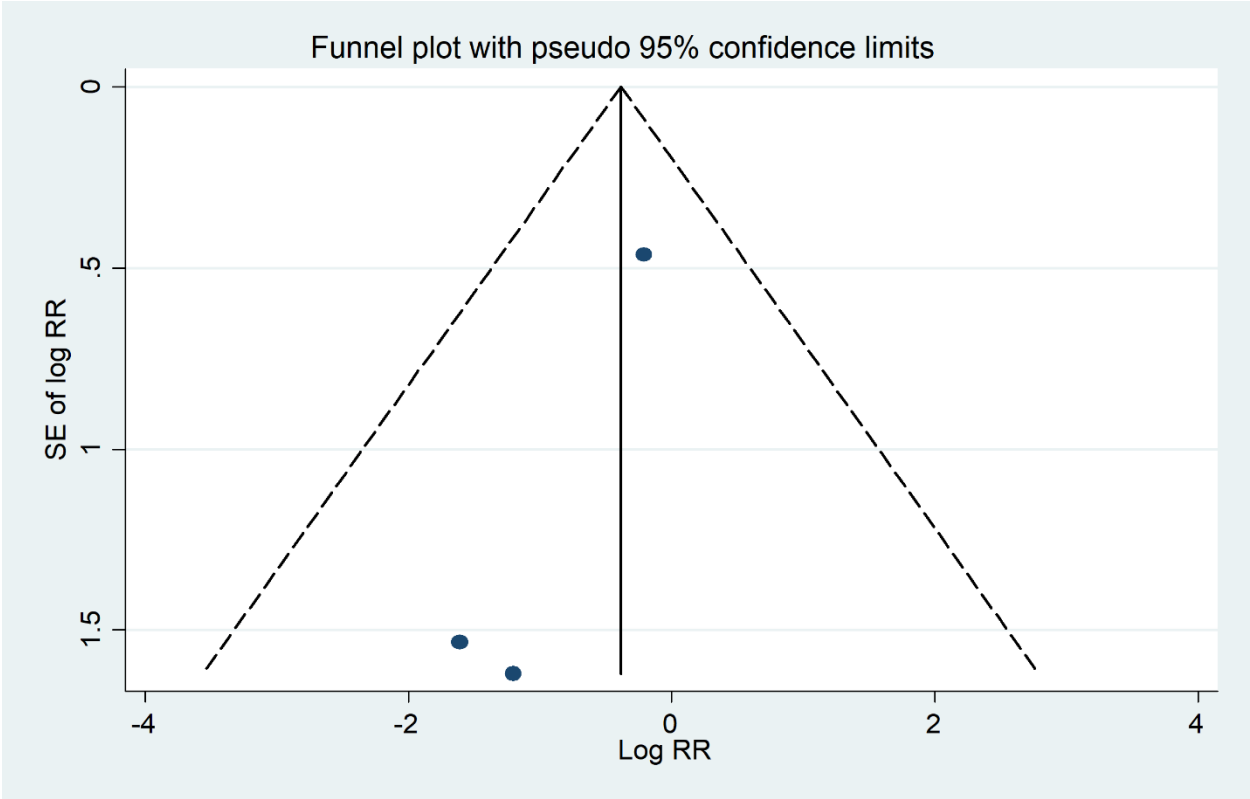

**Funnel plot for pooled risk ratio analysis of implant failure rate after 12-15 years.**

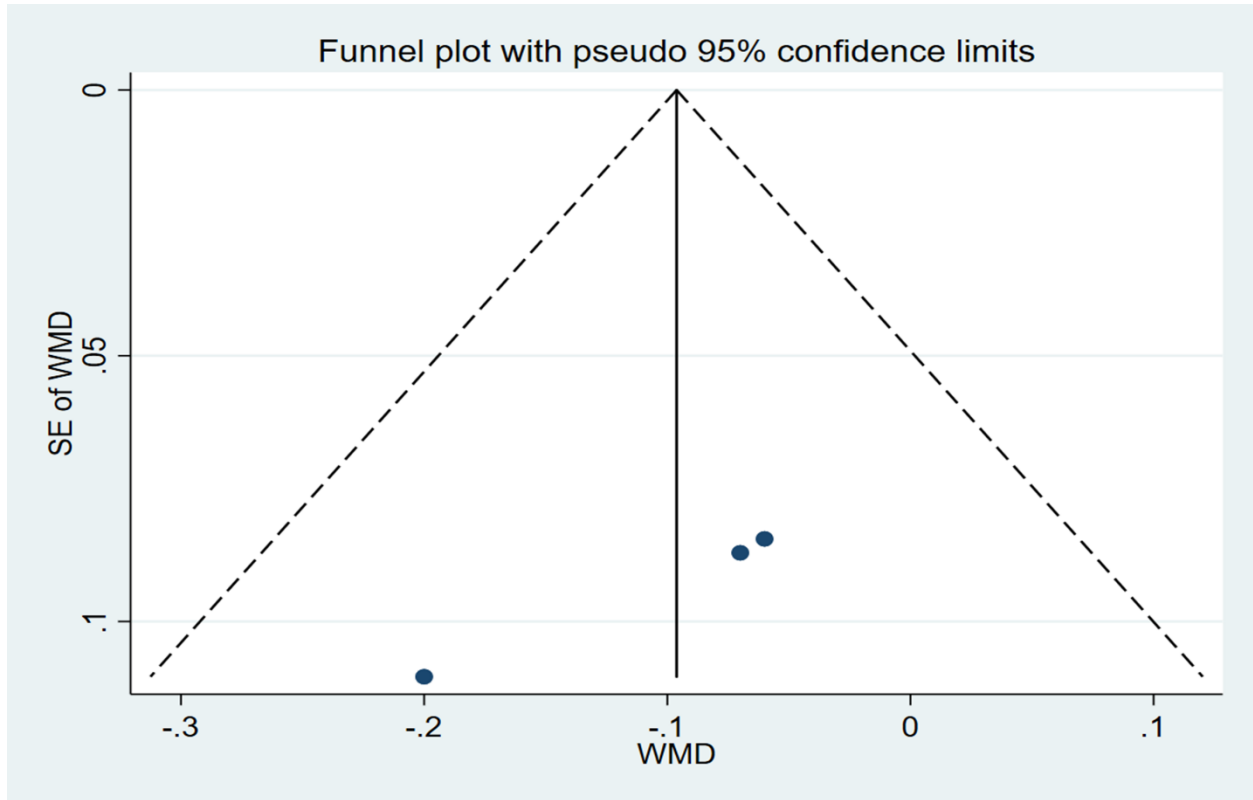

**Funnel plot for weighted mean difference of marginal bone level change after 1 year.**

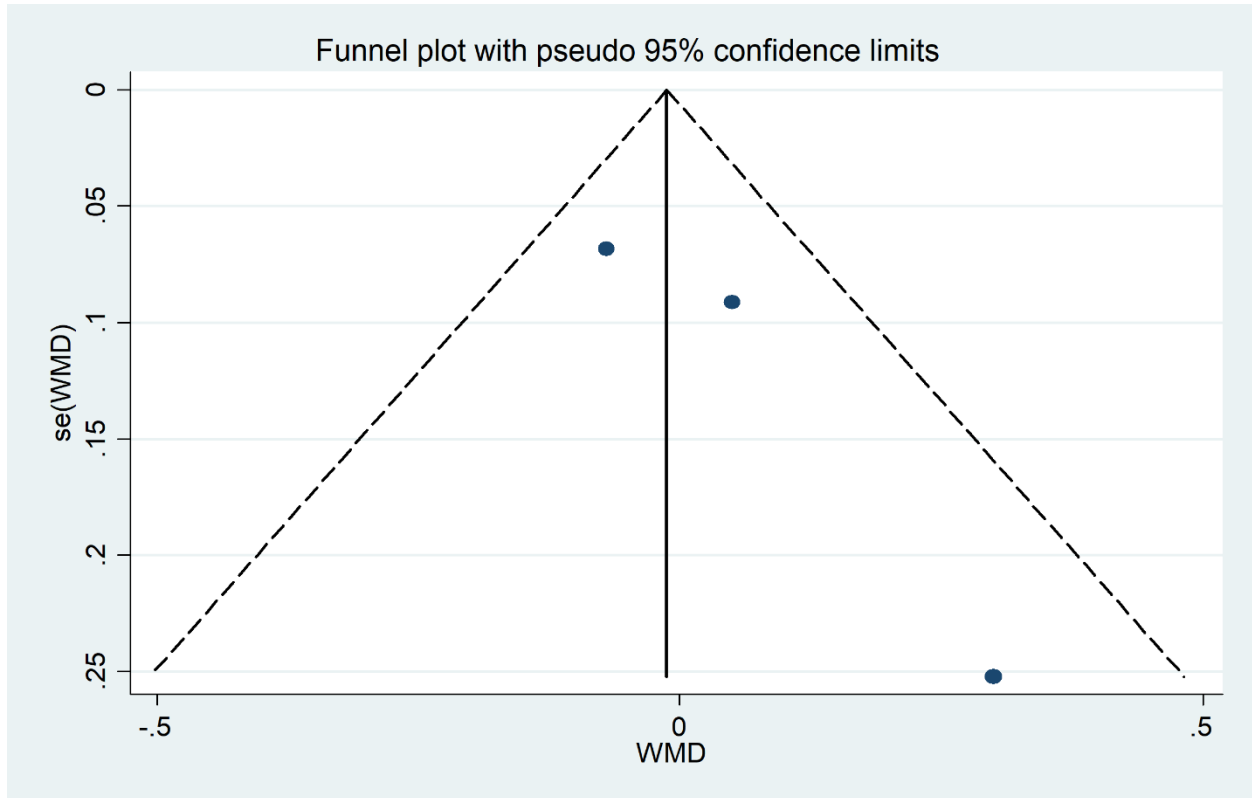

**Funnel plot for weighted mean difference of marginal bone level change after 5 years.**

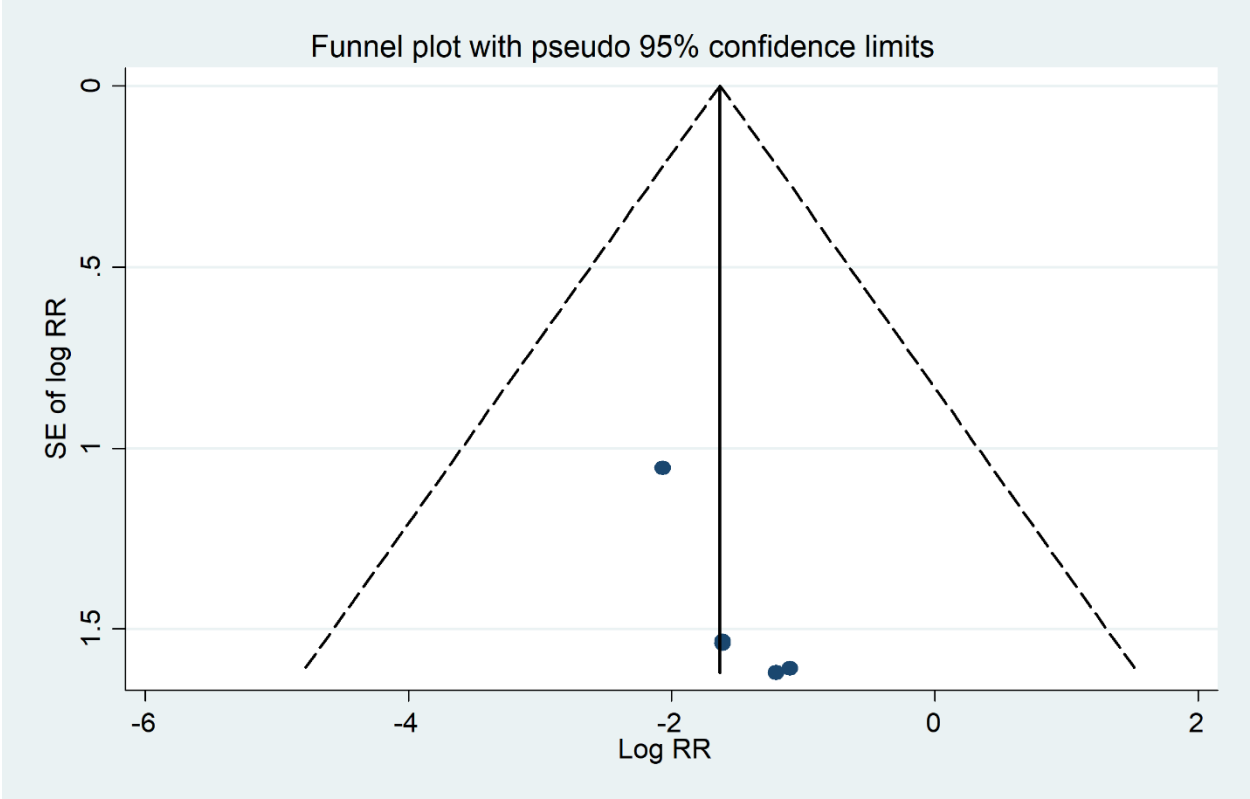

Supplement: pone.0216428.s004.pdf [file pone.0216428.s004.pdf]
